# Supplementary material for: Global Health as “umbrella term” – a qualitative study among Global Health teachers in German medical education
Source: PubMed Central journal article supplement (PMC5870065; doi:10.1186/s12992-018-0352-y), 2018-03-27
Supplement: 12992_2018_352_MOESM2_ESM.pdf [file 12992_2018_352_MOESM2_ESM.pdf]

## Synopsis of Learning Outcomes and Competencies for Global Health Education

| Johnson et al[1]                                                                                                                                                                                                                                                                         | Bozorgmehr et al[2]                                                                                                                                                                                                                                                                                                                                                                                                                                                                                                                     | Rowson [3]                                                                                                                                                                                                                                                                                                                                                                                                                                             | BVMD[4]                                                                                                                                                                                | CUGH [5]                                                                                                                                                                                                                                                                                                                                                                                                                                                                                           | Houpt[6]                                                                                                                                | Our study                                                                                                                                            |
|------------------------------------------------------------------------------------------------------------------------------------------------------------------------------------------------------------------------------------------------------------------------------------------|-----------------------------------------------------------------------------------------------------------------------------------------------------------------------------------------------------------------------------------------------------------------------------------------------------------------------------------------------------------------------------------------------------------------------------------------------------------------------------------------------------------------------------------------|--------------------------------------------------------------------------------------------------------------------------------------------------------------------------------------------------------------------------------------------------------------------------------------------------------------------------------------------------------------------------------------------------------------------------------------------------------|----------------------------------------------------------------------------------------------------------------------------------------------------------------------------------------|----------------------------------------------------------------------------------------------------------------------------------------------------------------------------------------------------------------------------------------------------------------------------------------------------------------------------------------------------------------------------------------------------------------------------------------------------------------------------------------------------|-----------------------------------------------------------------------------------------------------------------------------------------|------------------------------------------------------------------------------------------------------------------------------------------------------|
| <ul style="list-style-type: none"> <li>- Global Burden of Disease</li> <li>- Socioeconomic and environmental determinants of health</li> <li>- Health Systems</li> <li>- Global Health Governance</li> <li>- Human rights and ethics</li> <li>- Cultural diversity and health</li> </ul> | <ul style="list-style-type: none"> <li>- Embrace health determinants from the territorial up to the supraterritorial dimension.</li> <li>- Link these dimensions 'adequately' and provide an understanding of their interrelations.</li> <li>- Lead to the literacy and ability of the health workforce to link and transfer local health issues to global contexts (and vice versa).</li> <li>- Facilitate the identification of actions – aimed at the different dimensions – to achieve health equity and health for all.</li> </ul> | <ul style="list-style-type: none"> <li>- International elective exchanges</li> <li>- The effects of poverty and inequality on health</li> <li>- International comparison of health systems</li> <li>- Globalization and health</li> <li>- International comparison of burden of disease</li> <li>- Tropical medicine</li> <li>- Travel medicine</li> <li>- International health and development</li> <li>- International movement of people</li> </ul> | <ul style="list-style-type: none"> <li>- Politics, Policies and Polity</li> <li>- Individual and Population Health</li> <li>- Social and Transborder Determinants of Health</li> </ul> | <ul style="list-style-type: none"> <li>- Global Burden of Disease</li> <li>- Globalization of Health and Health Care</li> <li>- Social and Environmental Determinants of Health</li> <li>- Capacity Strengthening*</li> <li>- Collaboration, Partnering and Communication</li> <li>- Ethics</li> <li>- Professional Practice</li> <li>- Health Equity and Social justice</li> <li>- Program Management*</li> <li>- Sociocultural and Political Awareness</li> <li>- Strategic Analysis*</li> </ul> | <ul style="list-style-type: none"> <li>- Burden of global disease</li> <li>- Traveler's medicine</li> <li>- Immigrant Health</li> </ul> | <ul style="list-style-type: none"> <li>- Health and Disease</li> <li>- Society and Environment</li> <li>- Politics and Healthcare Systems</li> </ul> |

\* Domains marked with an asterisk were only described for 'basic operational program-oriented level', not for every medical student.

BVMD: Bundesvertretung der Medizinstudierenden in Deutschland (Association of Medical Students in Germany)

CUGH: Consortium of Universities for Global Health

1. Johnson O, Bailey SL, Willott C, Crocker-Buque T, Jessop V, Birch M, Ward H, Yudkin JS: **Global health learning outcomes for medical students in the UK.** *Lancet* 2012, **379**(9831):2033–2035.
2. Bozorgmehr K, Saint VA, Tinnemann P: **The 'global health' education framework: a conceptual guide for monitoring, evaluation and practice.** *Globalization and health* 2011, **7**:8.
3. Rowson M, Smith A, Hughes R, Johnson O, Maini A, Martin S, Martineau F, Miranda JJ, Pollit V, Wake R *et al*: **The evolution of global health teaching in undergraduate medical curricula.** 2012.
4. Bozorgmehr K, Last K, Müller A, Schubert K: **Lehre am Puls der Zeit - Global Health in der Medizinischen Ausbildung: Positionen, Lernziele und methodische Empfehlungen.** *GMS Zeitschrift für medizinische Ausbildung* 2009, **26**(2).
5. Jogerst K, Callender B, Adams V, Evert J, Fields E, Hall T, Olsen J, Rowthorn V, Rudy S, Shen J *et al*: **Identifying interprofessional global health competencies for 21st-century health professionals.** *Annals of global health* 2015, **81**(2):239–247.
6. Houpt ER, Pearson RD, Hall T: **Three Domains of Competency in Global Health Education: Recommendations for All Medical Students.** *Acad Med* 2007, **82**(3):222-225.
